1 A novel systems biology approach to evaluate mouse models of  
2 late-onset Alzheimer's disease

3  
4  
5 Christoph Preuss<sup>1\*</sup>, Ravi Pandey<sup>1\*</sup>, Erin Piazza<sup>2</sup>, Alexander Fine<sup>1</sup>, Asli Uyar<sup>1</sup>, Thanneer  
6 Perumal<sup>2</sup>, Dylan Garceau<sup>1</sup>, Kevin P Kotredes<sup>1</sup>, Harriet Williams<sup>1</sup>, Lara M Mangravite<sup>3</sup>,  
7 Bruce T. Lamb<sup>4</sup>, Adrian L. Oblak<sup>4</sup>, Gareth R. Howell<sup>1</sup>, Michael Sasner<sup>1</sup>, Benjamin A  
8 Logsdon<sup>3</sup>, Gregory W. Carter<sup>1†</sup>

9  
10 <sup>1</sup> The Jackson Laboratory, Bar Harbor, ME, USA.

11 <sup>2</sup> NanoString, Seattle, WA, USA.

12 <sup>3</sup> Sage Bionetworks, Seattle, WA, USA.

13 <sup>4</sup> Stark Neurosciences Research Institute, Indiana University School of Medicine, Indianapolis,  
14 IN 46202 USA

15  
16 \* These authors contributed equally to the work

17 Keywords: Alzheimer's disease, gene expression, co-expression modules, mouse  
18 models, reproducibility

19 †Correspondence:

20 Gregory Carter, Ph.D.

21 The Jackson Laboratory

22 600 Main Street

23 04609 Bar Harbor, Maine

24 Phone: (207)-288-6025

25 Email: [Gregory.Carter@jax.org](mailto:Gregory.Carter@jax.org)

26 Word count: 4058

27 Keywords: Alzheimer, Transcriptome, Mouse, Co-expression network analysis, RNAseq

28

29 **ABSTRACT**

30

31 **Background:** Late-onset Alzheimer's disease (LOAD) is the most common form of  
32 dementia worldwide. To date, animal models of Alzheimer's have focused on rare  
33 familial mutations, due to a lack of frank neuropathology from models based on  
34 common disease genes. Recent multi-cohort studies of postmortem human brain  
35 transcriptomes have identified a set of 30 gene co-expression modules associated with  
36 LOAD, providing a molecular catalog of relevant endophenotypes. **Results:** This  
37 resource enables precise gene-based alignment between new animal models and  
38 human molecular signatures of disease. Here, we describe a new resource to efficiently  
39 screen mouse models for LOAD relevance. A new NanoString nCounter® Mouse AD  
40 panel was designed to correlate key human disease processes and pathways with  
41 mRNA from mouse brains. Analysis of three mouse models based on LOAD genetics,  
42 carrying APOE4 and TREM2\*R47H alleles, demonstrated overlaps with distinct human  
43 AD modules that, in turn, are functionally enriched in key disease-associated pathways.  
44 Comprehensive comparison with full transcriptome data from same-sample RNA-Seq  
45 shows strong correlation between gene expression changes independent of  
46 experimental platform. **Conclusions:** Taken together, we show that the nCounter  
47 Mouse AD panel offers a rapid, cost-effective and highly reproducible approach to  
48 assess disease relevance of potential LOAD mouse models.

49

50

51

## 52 **BACKGROUND**

53 Late-onset Alzheimer's disease (LOAD) is the most common cause of dementia  
54 worldwide (1). LOAD presents as a heterogenous disease with highly variable  
55 outcomes. Recent efforts have been made to molecularly characterize LOAD using  
56 large cohorts of post-mortem human brain transcriptomic data (2). Systems-level  
57 analysis of these large human data sets has revealed key drivers and molecular  
58 pathways that reflect specific changes resulting from disease (2,3). These studies have  
59 been primarily driven by gene co-expression analyses that reduce transcriptomes to  
60 modules representing specific disease processes or cell types across heterogenous  
61 tissue samples (2,4,5). Similar approaches have been used to characterize mouse  
62 models of neurodegenerative disease (6). Detailed cross-species analysis reveals a  
63 translational gap between animal models and human disease, as no existing models  
64 fully recapitulate pathologies associated with LOAD (7,8). New platforms to rapidly  
65 assess the translational relevance of new animal models of LOAD will allow efficient  
66 identification of the most promising preclinical models.

67 In this study, we describe a novel gene expression panel to assess LOAD-relevance of  
68 mouse models based on expression of key genes in the brain. We used a recent human  
69 molecular disease catalog based on harmonized co-expression data from three  
70 independent post mortem brain cohorts (ROSMAP, Mayo, Mount Sinai Brain bank) (9–  
71 11) and seven brain regions that define 30 human co-expression modules and five  
72 consensus clusters derived from the overlap of those modules (12). These modules  
73 were used to design a mouse gene expression panel to assess the molecular overlap  
74 between human disease states and mouse models. This nCounter Mouse AD panel

75 was piloted with samples from three novel mouse models of LOAD. Same-sample  
76 comparison between NanoString and RNA-Seq data demonstrated high per-gene  
77 correlation and overall concordance when separately compared to human disease co-  
78 expression modules. Taken together, the rapid screening of mouse models in the  
79 course of different life stages will allow better characterization of models based on  
80 alignment with specific human molecular pathologies.

81

## 82 **RESULTS**

83 *Human-mouse co-expression module conservation and probe coverage across 30*

84 *LOAD associated modules*

85 An overview of the Mouse AD panel design for translating the 30 human AMP-AD co-  
86 expression modules from three cohorts and seven brain regions is depicted in Figure 1.  
87 Mouse to human gene prioritization resulted in the selection of 760 key mouse genes  
88 targeting a subset of highly co-expressed human genes plus 10 housekeeping genes,  
89 which explained a significant proportion of the observed variance across the 30 human  
90 AMP-AD modules (Methods). Co-expression modules were grouped into functionally  
91 distinct consensus clusters as previously described by Logsdon, et al (see also  
92 Supplemental Table 1) (12). These consensus clusters contain expression modules  
93 from different brain regions and independent studies that share a high overlap in gene  
94 content and similar expression characteristics. Consensus clusters were annotated  
95 based on Reactome pathway enrichment analysis for the corresponding genes within  
96 each functionally distinct cluster (Methods, Supplemental Table 1). Since consensus  
97 clusters showed an enrichment of multiple biological pathways, the highest rank and

98 non-overlapping Reactome pathway was used to refer to each cluster (Supplemental  
99 Table 2). In order to assess the conservation of sequence and gene expression levels  
100 between human and mouse genes for each of the 30 human co-expression modules,  
101 dN/dS values were correlated with the overall overlap in expression in brains from six-  
102 month-old C57BL/6J (B6) mice (Figure 2A). The fraction of orthologous genes  
103 expressed in the mouse brain, based on the presence or absence of transcripts at  
104 detectable levels, was very highly correlated with the overall module conservation (p-  
105 value < 2.2e-16, Pearson's correlation coefficient: -0.96). Module conservation was  
106 based on the median dN/dS statistics measuring the rate of divergence in the coding  
107 sequence for all genes within a given module between both species (Figure S1).  
108 Notably, human co-expression modules of Consensus Cluster C, associated with the  
109 neuronal system and neurotransmission, showed the lowest degree of sequence  
110 divergence with a high proportion of human genes (64-72%) expressed in six-month-old  
111 B6 mice. In contrast to the highly conserved neuronal modules, immune modules of  
112 Consensus Cluster B contained genes that recently diverged on the sequence level and  
113 acquired a higher number of destabilizing missense variants. These modules showed  
114 the highest median dN/dS values and the lowest fraction of genes (27-46%) expressed  
115 in the mouse brain across all tested modules. The remaining human co-expression  
116 modules, associated with different functional categories (Figure 2A, Supplemental Table  
117 1), had intermediate overlap in expression levels between human and mice. Each of the  
118 30 human co-expression modules was covered with an average of 148 NanoString  
119 mouse probes (SD = 50 probes), where a single mouse probe can map to multiple  
120 human modules from different study cohorts and across several brain regions. Overall,

121 mouse probe coverage for human co-expression modules ranged between 4% and  
122 19%, depending on the size and level of conservation of the targeted human module  
123 (Figures 2B and 2C, Supplemental Tables S2 and S3). For three of the largest human  
124 co-expression modules harboring over 4,000 transcripts, the probe coverage was  
125 slightly below the targeted 5% coverage threshold. However, these large modules are  
126 predominantly associated with neuronal function and show a high degree of expression  
127 and sequence conservation between human and mouse (Figures 2A). Immune  
128 modules, containing genes that recently diverged on the coding sequence level, are well  
129 covered with a median coverage of 10% (Figure 2C). A complete annotation of mouse  
130 probes to human transcripts for each human co-expression module is provided in  
131 Supplemental Table S3. In addition, we compared our novel panel to the existing  
132 nCounter Mouse Neuropathology panel designed to assess expression changes in  
133 multiple neurodegenerative diseases. We observed an overlap of 105 probes (7%)  
134 between both panels, highlighting that most of our selected probe content is novel and  
135 specific to LOAD associated disease processes and pathways.

136 *Prioritized subset of key genes show a higher degree of sequence conservation and*  
137 *expression level across modules*

138 In order to assess the level of sequence divergence and expression for the prioritized  
139 subset of genes on the novel panel, the selected subset of genes were compared to all  
140 genes across the 30 human co-expression modules. The 760 key genes, explaining a  
141 significant proportion of the observed variance in each human module, showed an  
142 overall lower level of sequence divergence (median dN/dS values) when compared to  
143 all other genes in the modules (Figure 3, Figure S1). Furthermore, the selected key

144 genes on the Mouse AD panel also displayed a higher average level of gene expression  
145 in brains of six-month-old B6 mice compared to the remaining genes for each of the 30  
146 modules (Figure 3). This highlights that our formal prioritization procedure resulted in  
147 the selection of a subset of highly expressed key genes, which are also more conserved  
148 between human and mouse facilitating the translation of co-expression profiles across  
149 species.

150 *Novel mouse models harboring LOAD associated risk variants correlate with distinct*  
151 *AMP-AD modules in a brain region- and pathway-specific manner*

152 Three novel mouse models, harboring two LOAD risk alleles, (Supplemental Table S4)  
153 were used to translate co-expression profiles between human and mouse brain  
154 transcriptome data using our novel Mouse AD panel. Transcriptome analysis was  
155 performed for the APOE4 KI mouse, carrying a humanized version of the strongest  
156 LOAD associated risk allele (*APOE-ε4*) and the Trem2\*R47H mouse, which harbors a  
157 rare deleterious variant in *TREM2*. The rare *TREM2* R47H missense variant  
158 (rs75932628) has been previously associated with LOAD in multiple independent  
159 studies [16,17]. In addition, a mouse model harboring both, the common and rare AD  
160 risk variants (APOE4 KI/Trem2\*R47H) was used to compare the transcriptional effects  
161 in mice carrying both variants to mice carrying only a single risk allele and B6 controls.  
162 Mouse transcriptome data for half brains was analyzed at different ages (4-14 months)  
163 to estimate the overlap with human post-mortem co-expression modules during aging.  
164 We observed specific overlaps with distinct disease processes and molecular pathways  
165 at different ages for the APOE4 KI and Trem2\*R47H mouse models. At an early age (2-  
166 5 months), male APOE4 KI and Trem2\*R47H mice showed strong positive correlations

167 (p-value < 0.05, Pearson's correlation coefficient < -0.3) with human co-expression  
168 modules in Consensus Cluster E that are enriched for transcripts associated with cell  
169 cycle and RNA non-mediated decay pathways in multiple brain regions (Figure 4).  
170 Furthermore, Trem2\*R47H male mice showed a significantly negative association (p-  
171 value < 0.05, Pearson's correlation coefficient < -0.2) with immune related human  
172 modules in the superior temporal gyrus, the inferior frontal gyrus, cerebellum and  
173 prefrontal cortex (Figure 4). This effect becomes more pronounced later in  
174 development, between six and 14 months, when the correlation with human immune  
175 modules is also observed in Trem2\*R47H female mice. During mid-life, (6-9 month-old  
176 age group), we observed an age-dependent effect for the APOE4 KI mouse in which  
177 human neuronal modules in Consensus Cluster C start to become positively correlated  
178 with the corresponding human expression modules (Figure 4). Interestingly, neuronal  
179 co-expression modules which are associated with synaptic signaling appear to be  
180 positively correlated with APOE4 KI, but not Trem2\*R47H mice in an age dependent  
181 manner. This up-regulation of genes associated with synaptic signaling and a decrease  
182 of transcripts enriched for cell cycle, RNA non-mediated decay, myelination and glial  
183 development in aged mice was consistent for multiple brain regions and across three  
184 independent human AD cohorts. When compared to APOE4 KI mice, Trem2\*R47H  
185 mice showed an age dependent decrease in genes associated with the immune  
186 response in several AMP-AD modules which is not observed for APOE4 KI mice (Figure  
187 4). Notably, the APOE4 KI/Trem2\*R47H mice showed characteristics of both single  
188 variant mouse models. At an early age, an overlap with both neuronal and immune  
189 associated human modules is observed and becomes more pronounced during aging.



## 190 *Comparison between nCounter Mouse AD panel and RNA-Seq data*

191 To assess the validity of the novel Mouse AD panel across transcriptomic platforms, we  
192 compared the results from the nCounter analysis to results from RNA-Seq data for the  
193 same 137 mouse brain samples. A correlation analysis was performed to compare the  
194 expression of the 770 NanoString probes across co-expression modules with RNA-Seq  
195 transcript expression for all ages (3-5, 7-9, 12-14 months), highlighting the different  
196 LOAD mouse models as independent variables (Figure 5). For the direct comparison,  
197 between the 770 NanoString probes with corresponding RNA-Seq transcripts, a similar  
198 range of correlation coefficients between human data and the three mouse models was  
199 observed (Figure 5A). Overall, the correlation between the RNA-Seq and NanoString  
200 platforms were high across all age groups (Pearson's correlation coefficients: 0.65-0.69)  
201 when comparing the subset of 760 key transcripts and 10 housekeeping transcripts  
202 across platforms. This demonstrates that the novel NanoString panel, despite the  
203 limited number of key custom probes, can achieve similar results when compared to  
204 high-throughput RNA-Seq data. Furthermore, the alignment of human and mouse  
205 modules based on the expression of all genes within each modules showed a weaker  
206 range of correlations when compared to transcripts covered by the 770 NanoString  
207 probes (Figure 5B). Notably, we observed an age specific effect in which the correlation  
208 between nCounter probe expression and RNA-Seq transcripts increased over time  
209 (Figure 5B). A mild correlation at around three months of age (Pearson's correlation  
210 coefficient: 0.39) increased to a moderate correlation at 12 months of age (Pearson's  
211 correlation coefficient: 0.51). Furthermore, we observed a high correlation of log count  
212 values for the majority of NanoString probes when compared to log TPM transcript

213 ratios from RNA-Seq data. The majority of the 770 measured NanoString probes  
214 (716/770 probes, 93%) were positively correlated with RNA-Seq transcripts (Figure S2).  
215 In order to test whether noise introduced by highly variable transcripts affects the  
216 correlation between NanoString probes and RNA-Seq transcripts, Pearson's correlation  
217 coefficients and variance in RNA-Seq expression across 137 samples were compared.  
218 There was no significant trend indicating an effect of highly variable transcripts on the  
219 overall correlation coefficients between transcripts measured by RNA-Seq and  
220 NanoString (Figure S2).

## 221 **DISCUSSION**

222 Here, we describe a novel systems biology approach to rapidly assess disease  
223 relevance for three novel mouse models carrying two human risk variants, strongly  
224 associated with LOAD. The nCounter Mouse AD gene expression panel was designed  
225 to align human brain transcriptome data covering 30 co-expression modules. Cross-  
226 species comparison of human and mouse revealed that immune associated co-  
227 expression modules which harbor genes that have recently diverged in sequence were  
228 more likely to be lowly expressed or absent at the transcript level in brains from 6 month  
229 old B6 mice. In contrast, neuronal modules containing genes with a lower degree of  
230 sequence divergence between both species were more likely to be highly and  
231 constitutively expressed in the mouse brain when compared to the remaining co-  
232 expression modules. This is in line with evidence from multiple studies highlighting that  
233 conserved neuronal process in the brain are under strong purifying selection while  
234 immune related genes are more likely to diverge in function and expression patterns  
235 across species (13,14). By using our prioritization approach, we selected for 760 key

236 mouse genes targeting a subset of highly co-expressed human genes. This subset of  
237 genes on the NanoString panel showed overall lower levels of sequence divergence  
238 compared to human genes and higher expression levels in the mouse brain, reducing  
239 potential noise introduced by lowly expressed transcripts across expression modules.

240 Furthermore, we observed a robust and significant correlation between human co-  
241 expression modules and three mouse models carrying two LOAD associated risk  
242 variants (APOE4 KI, Trem2\*R47H, APOE4 KI/Trem2\*R47H). Cross-platform  
243 comparison between the novel Mouse AD panel and RNA-Seq data revealed a strong  
244 correlation between mouse gene expression changes independent of platform related  
245 effects. Notably, the correlation between nCounter probe and RNA-Seq transcript  
246 expression with human co-expression modules was highest in aged mice older than 12  
247 months. This age-dependent overlap might be expected due to the late-onset nature of  
248 Alzheimer's disease resulting in an increased number of highly co-expressed genes in  
249 aged mice carrying human LOAD risk variants. In addition, the strongest correlation  
250 between human and mouse module signatures was observed when using the subset of  
251 770 transcripts on the NanoString panel. This highlights that assessment of key genes  
252 in the brain, contributing highly to module expression, can improve the characterization  
253 of novel LOAD mouse models and their alignment with specific human co-expression  
254 modules.

255 Interestingly, novel LOAD mouse models showed better concordance with distinct  
256 human co-expression modules, reflecting a different transcriptional response driven by  
257 the human *APOE* and *TREM2* associated LOAD risk variants. The strong negative  
258 correlation between the Trem2\*R47H knock-in mice and immune related human co-

259 expression highlights the important role of the LOAD associated *TREM2* R47H variant  
260 in Alzheimer's related immune processes. This effect is reproducible across human co-  
261 expression modules, which derive from three independent cohorts and five different  
262 brain regions (cerebellum, frontal cortex, temporal gyrus, frontal gyrus, frontal pole).  
263 Similarly, a strong negative correlation between co-expression modules associated with  
264 cell cycle and DNA repair was observed for the mouse APOE4 KI model. This overlap  
265 with human late-onset co-expression signatures early in life was observed for a number  
266 of different brain regions and is absent in Trem2\*R47H knock-in mice. Furthermore,  
267 aged APOE4 KI mice show a strong overlap with several human neuronal co-  
268 expression modules enriched for genes that play an important role in synaptic signaling  
269 and myelination. Although, APOE4 KI mice lack a clear neurodegenerative phenotype,  
270 this age dependent shift in co-expression patterns associated with core LOAD  
271 pathologies points to an increased susceptibility of cognitive decline in aged mice. This  
272 is in line with several studies, which have shown that cognitive deficits in APOE4  
273 transgenic mice develop late in life (15,16).

#### 274 *Limitations of the approach*

275 Albeit being an excellent resource for characterizing molecular pathways and key  
276 drivers of disease, co-expression modules based on human post-mortem brain data  
277 have several limitations. They might not reflect changes that occur early in disease  
278 pathogenesis. In addition, although a high concordance was observed across brain  
279 regions for the 30 modules, they might not cover individual or region-specific differences  
280 in patients in response to amyloid and tau pathology (12). Furthermore, we used brain  
281 homogenates from our mouse models for the transcript comparison with different

282 human brain regions in this study. Dissection of mouse brain regions to match the  
283 human studies might further improve the observed co-expression module correlations.

## 284 **CONCLUSIONS**

285 Taken together, we show that the novel nCounter Mouse AD gene expression panel  
286 offers a rapid and cost-effective approach to assess disease relevance of novel LOAD  
287 mouse models. Furthermore, this co-expression based approach offers a high level of  
288 reproducibility and will supplement methods solely based on differential expression  
289 analysis. Ultimately, this will help us to better understand the relevance of novel LOAD  
290 mouse models in regard to specific pathways and processes contributing to late-onset  
291 Alzheimer's disease.

## 292 **METHODS**

### 293 *AMP-AD post-mortem brain cohorts and gene co-expression modules*

294 Data on the 30 human AMP-AD co-expression modules was obtained from the Synapse  
295 data repository (DOI: 10.7303/syn11932957.1). The modules derive from three  
296 independent LOAD cohorts, including 700 samples from the ROSMAP cohort, 300  
297 samples from the Mount Sinai Brain bank and 270 samples from the Mayo cohort.  
298 Details on post-mortem brain sample collection, tissue and RNA preparation,  
299 sequencing, and sample QC can be found in previously published work related to each  
300 cohort (10,11,17). A detailed description on how co-expression modules were identified  
301 can be found in the recent study that identified the harmonized human co-expression  
302 modules as part of transcriptome wide AD meta-analysis (12). Briefly, Logsdon et al.  
303 performed library normalization and covariate adjustments for each human study

304 separately using fixed/mixed effects modeling to account for batch effects. Among the  
305 2,978 AMP-AD modules identified across all tissues (10.7303/syn10309369.1), 660  
306 modules were selected by Logsdon et al. which showed an enrichment for at least one  
307 AD-specific differential expressed gene set from the meta-analysis  
308 (10.7303/syn11914606) in cases compared to controls. Lastly, the edge betweenness  
309 graph clustering method was applied to identify 30 aggregate modules that are not only  
310 differentially expressed but are also replicated across multiple independent co-  
311 expression module algorithms (12). Among the 30 aggregate co-expression modules,  
312 five consensus clusters have been described by Logsdon et al. (12). These consensus  
313 clusters consist of a subset of modules which are associated with similar AD related  
314 changes across the multiple studies and brain regions. Here, we used Reactome  
315 pathway (<https://reactome.org/>) enrichment analysis to identify specific biological  
316 themes across these five consensus clusters. A hypergeometric model, implemented in  
317 the clusterProfiler R package (18), was used to assess whether the number of selected  
318 genes associated within each set of AMP-AD modules defining a consensus cluster was  
319 larger than expected. All p-values were calculated based the hypergeometric model  
320 (19). Pathways were ranked based on their Bonferroni corrected p-values to account for  
321 multiple testing. Finally, consensus clusters were annotated based on the highest  
322 ranked and non-overlapping term for each functionally distinct cluster.

### 323 *Selection of NanoString probes for the nCounter Mouse AD Panel*

324 Since NanoString gene expression panels are comprised of 770 probes with the option  
325 to customize 30 additional probes, we developed a formal prioritization procedure to  
326 identify the most representative genes and ensure broadest coverage across all

327 modules (Figure 1). Expression and transcript annotations for the 30 human co-  
328 expression modules were obtained via the AMP-AD knowledge portal  
329 ([www.synapse.org/#!/Synapse:syn11870970/tables/](http://www.synapse.org/#!/Synapse:syn11870970/tables/)). To prioritize probe targets for the  
330 novel Mouse AD panel, human genes were ranked within each of the human AMP-AD  
331 co-expression modules based on their percentage of variation explaining the overall  
332 module behavior. First, we calculated a gene ranking score by multiplying correlations  
333 of transcripts with the percentage of variation explained by the first five principal  
334 components within each of the aggregated human AMP-AD modules. Secondly, the  
335 sums of the resulting gene scores for the first five principal components were calculated  
336 and converted to absolute values in order to rank highly positive or negative correlated  
337 transcripts within each human co-expression module. As a next step, only human  
338 transcripts with corresponding one-to-one mouse orthologous genes that are expressed  
339 in whole-brain tissue samples from six-month-old B6 mice were retained for  
340 downstream prioritization. Furthermore, we included information on drug targets for  
341 LOAD from the AMP-AD Agora platform ([agora.ampadportal.org](http://agora.ampadportal.org)), as nominated by  
342 members of the AMP-AD consortium (10.7303/syn2580853). A total of 30 AMP-AD drug  
343 discovery targets that were highly ranked in our gene ranking approach and nominated  
344 by multiple AMP-AD groups were included on the panel (Supplemental Table 3). Finally,  
345 ten housekeeping genes (*AARS*, *ASB7*, *CCDC127*, *CNOT10*, *CSNK2A2*, *FAM104A*,  
346 *LARS*, *MTO1*, *SUPT7L*, *TADA2B*) were included on the panel as internal standard  
347 references for probe normalization. This resulted in a total of 770 proposed NanoString  
348 probes, targeting the top 5% of ranked genes for each human AMP-AD expression  
349 module.

### 350 *nCounter Mouse AD Panel Probe Design*

351 The probe design process breaks a transcript's sequence down into 100 nucleotide (nt)  
352 windows to profile for probe characteristics, with the final goal of choosing the optimal  
353 pair of adjacent probes to profile any given target. Each window is profiled for intrinsic  
354 sequence makeup – non-canonical bases, G/C content, inverted and direct repeat  
355 regions, runs of poly-nucleotides, as well as the predicted melting temperature (T<sub>m</sub>) for  
356 each potential probe-to-target interaction. The window is then divided in half to  
357 generate a probe pair, wherein each probe is thermodynamically tuned to determine the  
358 optimal probe length (ranging in size from 35-50 nt) within the 100 nt target region.  
359 Next, a cross-hybridization score is calculated for each probe region, using BLAST (20)  
360 to identify potential off-target interactions. In addition to a cross-hybridization score, a  
361 splice isoform coverage score was generated to identify transcripts that are isoforms of  
362 the gene intended to be targeted by the probe in question. Once all of this information is  
363 compiled, the final probe is then selected by identifying the candidate with the optimal  
364 splice form coverage, cross-hybridization score, and thermodynamic profile.

### 365 *In-silico panel QC for intramolecular interactions*

366 To ensure that there are no potential intramolecular probe-probe interactions that could  
367 cause elevated background for any individual probe pair, a stringent intermolecular  
368 screen is run on every collection of probes assembled into a panel. A sensitive  
369 algorithm was used that calculates both the T<sub>m</sub> and the free energy potential of  
370 interactions between every possible pair of probes in the project. If two probes conflict in  
371 a way that would likely cause background based on this calculation, an alternative



372 probe is selected for one of the targets and the screening is re-run until there are no  
373 known conflicts.

#### 374 *Mouse models*

375 All experiments involving mice (Supplemental Table S4) were conducted in accordance  
376 with policies and procedures described in the Guide for the Care and Use of Laboratory  
377 Animals of the National Institutes of Health and were approved by the Institutional  
378 Animal Care and Use Committee at The Jackson Laboratory. All mice were bred and  
379 housed in a 12/12 hour light/dark cycle. All experiments were performed on a unified  
380 genetic background (C57BL/6J).

#### 381 *Mouse brain sample collection*

382 Upon arrival at the terminal endpoint for each aged mouse cohort, individual animals  
383 were weighed prior to intraperitoneal administration of ketamine (100mg/kg) and  
384 xylazine (10mg/kg). First confirming deep anesthetization via toe pinch, an incision was  
385 made along the midline to expose the thorax and abdomen followed by removal of the  
386 lateral borders of the diaphragm and ribcage revealed the heart. A small cut was placed  
387 in the right atrium to relieve pressure from the vascular system before transcordially  
388 perfusing the animal with 1XPBS via injection into the left ventricle. With the vascular  
389 system cleared, the entire brain was carefully removed and weighed before hemisecting  
390 along the midsagittal plane. Hemispheres were immediately placed in a cryovial and  
391 snap-frozen on dry ice. Brain samples were stored at -80°C until RNA extraction was  
392 performed.

#### 393 *RNA sample preparation*

394 RNA was isolated from tissue using the MagMAX mirVana Total RNA Isolation Kit  
395 (ThermoFisher) and the KingFisher Flex purification system (ThermoFisher, Waltham,  
396 MA). Brain hemispheres were thawed to 0°C and were lysed and homogenized in  
397 TRIzol Reagent (ThermoFisher). After the addition of chloroform, the RNA-containing  
398 aqueous layer was removed for RNA isolation according to the manufacturer's protocol,  
399 beginning with the RNA bead binding step. RNA concentration and quality were  
400 assessed using the Nanodrop 2000 spectrophotometer (Thermo Scientific) and the  
401 RNA Total RNA Nano assay (Agilent Technologies, Santa Clara, CA).

#### 402 *RNAseq library preparation and data collection*

403 Sequencing libraries were constructed using TruSeq DNA V2 (Illumina, San Diego, CA)  
404 sample prep kits and quantified using qPCR (Kapa Biosystems, Wilmington, MA). The  
405 mRNA was fragmented, and double-stranded cDNA was generated by random priming.  
406 The ends of the fragmented DNA were converted into phosphorylated blunt ends. An 'A'  
407 base was added to the 3' ends. Illumina®-specific adaptors were ligated to the DNA  
408 fragments. Using magnetic bead technology, the ligated fragments were size-selected  
409 and then a final PCR was performed to enrich the adapter-modified DNA fragments,  
410 since only the DNA fragments with adaptors at both ends will amplify. Libraries were  
411 pooled and sequenced by the Genome Technologies core facility at The Jackson  
412 Laboratory. Samples were sequenced on Illumina HiSeq 4000 using HiSeq 3000/4000  
413 SBS Kit reagents (Illumina), targeting 30 million read pairs per sample. Samples were  
414 split across multiple lanes when being run on the Illumina HiSeq, once the data was  
415 received the samples were concatenated to have a single file for paired-end analysis.

#### 416 *NanoString gene expression panel and data collection*

417 The NanoString Mouse AD gene expression panel was used for gene expression  
418 profiling on the nCounter platform (NanoString, Seattle, WA) as described by the  
419 manufacturer. nSolver software was used for analysis of NanoString gene expression  
420 values.

#### 421 *Normalization of NanoString data*

422 Normalization was done by dividing counts within a lane by geometric mean of the  
423 housekeeping genes from the same lane. For the downstream analysis, counts were  
424 log-transformed from normalized count values.

#### 425 *Mouse-human expression comparison*

426 First, we performed differential gene expression analysis for each mouse model and sex  
427 using the voom-limma (21) package in R. Secondly, we computed correlation between  
428 changes in expression (log fold change) for each gene in a given module with each  
429 mouse model, sex and age. Correlation coefficients were computed using cor.test  
430 function built in R as:

$$431 \quad \text{cor.test( LogFC(h), LogFC(m) )} \quad (1)$$

432 where LogFC(h) is the log fold change in transcript expression of human AD patients  
433 compared to control patients and LogFC(m) is the log fold change in expression of  
434 mouse transcripts compare to control mouse models. LogFC values for human  
435 transcripts were obtained via the AMP-AD knowledge portal  
436 (<https://www.synapse.org/#!/Synapse:syn11180450>).

437

438 *Quality control of RNA-Seq data and read alignment*

439 Sequence quality of reads was assessed using FastQC (v0.11.3, Babraham). Low-  
440 quality bases were trimmed from sequencing reads using Trimmomatic (v0.33) (22).  
441 After trimming, reads of length longer than 36 bases were retained. The average quality  
442 score at each base position was greater than 30 and sequencing depth were in range of  
443 60 – 120 million reads. All RNA-Seq samples were mapped to the mouse genome  
444 (mm10 reference, build 38, ENSEMBL) using ultrafast RNA-Seq aligner STAR (23)  
445 (v2.5.3). The genes annotated for mm10 (GRCm38) were quantified in two ways:  
446 Transcripts per million (TPM) using RSEM (v1.2.31) and raw read counts using HTSeq-  
447 count (v0.8.0).

448 *Mouse-human co-expression module conservation*

449 Genomic information on orthologous groups was obtained via the latest ENSEMBL build  
450 for human genome version GRCh38. All orthologous relationships were downloaded via  
451 BioMart (24) (biomart.org). dN/dS statistics were retrieved for all orthologous gene pairs  
452 with a one-to-one relationship between human and mouse. dN/dS values are calculated  
453 as the ratio of nonsynonymous substitutions to the number of synonymous substitutions  
454 in protein coding genes. The dN/dS values in ENSEMBL were calculated based on the  
455 latest version of the codeml (<http://abacus.gene.ucl.ac.uk/software/paml.html>) package  
456 using standard parameters ([ensembl.org/info/genome/compara/homology\\_method.html](http://ensembl.org/info/genome/compara/homology_method.html))  
457 (25).

458

459 **DECLARATIONS**

460 ***Acknowledgments***

461 We thank the many institutions and their staff that provided support for this study and  
462 who were involved in this collaboration. We would like to acknowledge Jamie Kuhar for  
463 her critically reading of the manuscript.

464 ***Funding***

465 This study was supported by the National Institutes of Health grant U54 AG 054354.

466 ***Availability of data and materials***

467 The results published here are in whole or in part based on data obtained from the  
468 AMP-AD Knowledge Portal (doi:10.7303/syn2580853). ROSMAP Study data were  
469 provided by the Rush Alzheimer's Disease Center, Rush University Medical Center,  
470 Chicago. Data collection was supported through funding by NIA grants P30AG10161,  
471 R01AG15819, R01AG17917, R01AG30146, R01AG36836, U01AG32984,  
472 U01AG46152, the Illinois Department of Public Health, and the Translational Genomics  
473 Research Institute. Mayo RNAseq Study data were provided by the following sources:  
474 The Mayo Clinic Alzheimer's Disease Genetic Studies, led by Dr. Nilufer Ertekin-Taner  
475 and Dr. Steven G. Younkin, Mayo Clinic, Jacksonville, FL using samples from the Mayo  
476 Clinic Study of Aging, the Mayo Clinic Alzheimer's Disease Research Center, and the  
477 Mayo Clinic Brain Bank. Data collection was supported through funding by NIA grants  
478 P50 AG016574, R01 AG032990, U01 AG046139, R01 AG018023, U01 AG006576,  
479 U01 AG006786, R01 AG025711, R01 AG017216, R01 AG003949, NINDS grant R01  
480 NS080820, CurePSP Foundation, and support from Mayo Foundation. Study data  
481 includes samples collected through the Sun Health Research Institute Brain and Body  
482 Donation Program of Sun City, Arizona. The Brain and Body Donation Program is  
483 supported by the National Institute of Neurological Disorders and Stroke (U24  
484 NS072026 National Brain and Tissue Resource for Parkinson's Disease and Related  
485 Disorders), the National Institute on Aging (P30 AG19610 Arizona Alzheimer's Disease

486 CoreCenter), the Arizona Department of Health Services (contract 211002, Arizona  
487 Alzheimer's Research Center), the Arizona Biomedical Research Commission  
488 (contracts 4001, 0011, 05-901 and 1001 to the Arizona Parkinson's Disease  
489 Consortium) and the Michael J. Fox Foundation for Parkinson's Research. MSBB data  
490 were generated from postmortem brain tissue collected through the Mount Sinai VA  
491 MedicalCenter Brain Bank and were provided by Dr. Eric Schadt from Mount Sinai  
492 School of Medicine. Mouse RNAseq data from the MODEL-AD consortium is available  
493 through Synapse via the AMP-AD knowledge portal  
494 ([www.synapse.org/#!/Synapse:syn17095980](http://www.synapse.org/#!/Synapse:syn17095980))

#### 495 ***Authors' contributions***

496 CP designed the novel transcriptome panel and performed bioinformatics analyses. RP,  
497 AF, AU, TP performed the gene-expression analyses in human and mouse brain tissue.  
498 EP designed the NanoString probes and guided the creation of the novel NanoString  
499 panel. BAL and LM curated human brain data. DG, GRH and MS performed mouse  
500 experiments. GWC and MS supervised and designed the project. All authors read and  
501 approved the manuscript. CP, GWC and RP wrote the manuscript.

#### 502 ***Ethics approval***

503 All experiments involving mice were conducted in accordance with policies and  
504 procedures described in the Guide for the Care and Use of Laboratory Animals of the  
505 National Institutes of Health and were approved by the Institutional Animal Care and  
506 Use Committee at The Jackson Laboratory.

#### 507 ***Consent for publication***

508 All authors have approved of the manuscript and agree with its submission.

#### 509 ***Competing interests***

510 *Not applicable*

511

512

## 513 REFERENCES

- 514 1. Mayeux R, Stern Y. Epidemiology of Alzheimer disease. Cold Spring Harb  
515 Perspect Med [Internet]. 2012 Aug 1 [cited 2019 Jan 14];2(8). Available from:  
516 <http://www.ncbi.nlm.nih.gov/pubmed/22908189>
- 517 2. Zhang B, Gaiteri C, Bodea L-G, Wang Z, McElwee J, Podtelezhnikov AA, et al.  
518 Integrated systems approach identifies genetic nodes and networks in late-onset  
519 Alzheimer's disease. Cell [Internet]. 2013 Apr 25 [cited 2019 Jan 14];153(3):707–  
520 20. Available from: <http://www.ncbi.nlm.nih.gov/pubmed/23622250>
- 521 3. Sarah M. Neuner, Timothy J Hohman, Ryan Richholt, David A Bennett, Julie A  
522 Schneider, Philip L De Jager, Matthew J Huentelman, Kristen M. S. O'Connell,  
523 Catherine C Kaczorowski Sarah M. Neuner, Timothy J Hohman, Ryan Richholt,  
524 David A Bennett, Julie A Schne CCK. Systems genetics identifies modifiers of  
525 Alzheimer's disease risk and resilience. bioRxiv. 2017;
- 526 4. Seyfried NT, Dammer EB, Swarup V, Nandakumar D, Duong DM, Yin L, et al. A  
527 Multi-network Approach Identifies Protein-Specific Co-expression in  
528 Asymptomatic and Symptomatic Alzheimer's Disease. Cell Syst [Internet]. 2017  
529 Jan 25 [cited 2019 Jan 17];4(1):60–72.e4. Available from:  
530 <http://www.ncbi.nlm.nih.gov/pubmed/27989508>
- 531 5. Miller JA, Woltjer RL, Goodenbour JM, Horvath S, Geschwind DH. Genes and  
532 pathways underlying regional and cell type changes in Alzheimer's disease.  
533 Genome Med [Internet]. 2013 [cited 2019 Jan 17];5(5):48. Available from:  
534 <http://www.ncbi.nlm.nih.gov/pubmed/23705665>
- 535 6. Matarin M, Salih DA, Yasvoina M, Cummings DM, Guelfi S, Liu W, et al. A  
536 Genome-wide Gene-Expression Analysis and Database in Transgenic Mice  
537 during Development of Amyloid or Tau Pathology. Cell Rep [Internet]. 2015 Feb 3  
538 [cited 2019 Jan 14];10(4):633–44. Available from:  
539 <http://www.ncbi.nlm.nih.gov/pubmed/25620700>
- 540 7. Onos KD, Sukoff Rizzo SJ, Howell GR, Sasner M. Toward more predictive  
541 genetic mouse models of Alzheimer's disease. Brain Res Bull [Internet]. 2016 Apr  
542 [cited 2019 Jan 14];122:1–11. Available from:  
543 <http://www.ncbi.nlm.nih.gov/pubmed/26708939>
- 544 8. Wan Y-W, Al-Ouran R, Mangleburg CG, Lee T V., Allison K, Neuner S, et al.  
545 Functional dissection of Alzheimer's disease brain gene expression signatures in  
546 humans and mouse models. bioRxiv [Internet]. 2019 Jan 3 [cited 2019 Apr  
547 12];506873. Available from: <https://www.biorxiv.org/content/10.1101/506873v1>
- 548 9. Allen M, Carrasquillo MM, Funk C, Heavner BD, Zou F, Younkin CS, et al. Human  
549 whole genome genotype and transcriptome data for Alzheimer's and other  
550 neurodegenerative diseases. Sci Data. 2016;3.



- 551 10. Jager P De, Ma Y, McCabe C, Xu J, Vardarajan BN, Felsky D, et al. A multi-omic  
552 atlas of the human frontal cortex for aging and Alzheimer's disease research.  
553 bioRxiv. 2018 Jan;251967.
- 554 11. Wang M, Beckmann ND, Roussos P, Wang E, Zhou X, Wang Q, et al. The Mount  
555 Sinai cohort of large-scale genomic, transcriptomic and proteomic data in  
556 Alzheimer's disease. *Sci Data*. 2018 Sep;5:180185.
- 557 12. Logsdon B, Perumal TM, Swarup V, Wang M, Funk C, Gaiteri C, et al. Meta-  
558 analysis of the human brain transcriptome identifies heterogeneity across human  
559 AD coexpression modules robust to sample collection and methodological  
560 approach. *bioRxiv* [Internet]. 2019 Jan 3 [cited 2019 Feb 9];510420. Available  
561 from: <https://www.biorxiv.org/content/10.1101/510420v1>
- 562 13. Geschwind DH, Rakic P. Cortical evolution: judge the brain by its cover. *Neuron*  
563 [Internet]. 2013 Oct 30 [cited 2019 Apr 10];80(3):633–47. Available from:  
564 <http://www.ncbi.nlm.nih.gov/pubmed/24183016>
- 565 14. Bauernfeind AL, Soderblom EJ, Turner ME, Moseley MA, Ely JJ, Hof PR, et al.  
566 Evolutionary Divergence of Gene and Protein Expression in the Brains of Humans  
567 and Chimpanzees. *Genome Biol Evol* [Internet]. 2015 Jul 10 [cited 2019 Apr  
568 10];7(8):2276–88. Available from: <http://www.ncbi.nlm.nih.gov/pubmed/26163674>
- 569 15. Rijpma A, Jansen D, Arnoldussen IAC, Fang XT, Wiesmann M, Mutsaers MPC, et  
570 al. Sex Differences in Presynaptic Density and Neurogenesis in Middle-Aged  
571 ApoE4 and ApoE Knockout Mice. *J Neurodegener Dis* [Internet]. 2013 [cited 2019  
572 Jan 17];2013:531326. Available from:  
573 <http://www.ncbi.nlm.nih.gov/pubmed/26316992>
- 574 16. Siegel JA, Haley GE, Raber J. Apolipoprotein E isoform-dependent effects on  
575 anxiety and cognition in female TR mice. *Neurobiol Aging* [Internet]. 2012 Feb  
576 [cited 2019 Jan 17];33(2):345–58. Available from:  
577 <http://www.ncbi.nlm.nih.gov/pubmed/20400205>
- 578 17. Allen M, Carrasquillo MM, Funk C, Heavner BD, Zou F, Younkin CS, et al. Human  
579 whole genome genotype and transcriptome data for Alzheimer's and other  
580 neurodegenerative diseases. *Sci Data*. 2016 Oct;3:160089.
- 581 18. Yu G, Wang L-G, Han Y, He Q-Y. clusterProfiler: an R package for comparing  
582 biological themes among gene clusters. *OMICS* [Internet]. 2012 May [cited 2019  
583 Jun 3];16(5):284–7. Available from:  
584 <http://www.ncbi.nlm.nih.gov/pubmed/22455463>
- 585 19. Boyle EI, Weng S, Gollub J, Jin H, Botstein D, Cherry JM, et al. GO::TermFinder--  
586 open source software for accessing Gene Ontology information and finding  
587 significantly enriched Gene Ontology terms associated with a list of genes.  
588 *Bioinformatics* [Internet]. 2004 Dec 12 [cited 2019 Jun 3];20(18):3710–5. Available  
589 from: [https://academic.oup.com/bioinformatics/article-  
590 lookup/doi/10.1093/bioinformatics/bth456](https://academic.oup.com/bioinformatics/article-lookup/doi/10.1093/bioinformatics/bth456)
- 591 20. ALTSCHUL SF, GISH W, MILLER W, MYERS EW, LIPMAN DJ. Basic local



- 592 alignment search tool. *J Mol Biol* [Internet]. 1990;215(3):403–10. Available from:  
593 <http://www.ncbi.nlm.nih.gov/pubmed/2231712>
- 594 21. Ritchie ME, Phipson B, Wu D, Hu Y, Law CW, Shi W, et al. limma powers  
595 differential expression analyses for RNA-Sequencing and microarray studies.  
596 *Nucleic Acids Res* [Internet]. 2015 Apr 20 [cited 2019 Feb 18];43(7):e47–e47.  
597 Available from: <http://www.ncbi.nlm.nih.gov/pubmed/25605792>
- 598 22. Bolger AM, Lohse M, Usadel B. Trimmomatic: a flexible trimmer for Illumina  
599 sequence data. *Bioinformatics* [Internet]. 2014 Aug 1 [cited 2019 Jan  
600 17];30(15):2114–20. Available from:  
601 <http://www.ncbi.nlm.nih.gov/pubmed/24695404>
- 602 23. Dobin A, Davis CA, Schlesinger F, Drenkow J, Zaleski C, Jha S, et al. STAR:  
603 ultrafast universal RNA-Seq aligner. *Bioinformatics* [Internet]. 2013 Jan 1 [cited  
604 2019 Jan 17];29(1):15–21. Available from:  
605 <http://www.ncbi.nlm.nih.gov/pubmed/23104886>
- 606 24. Durinck S, Moreau Y, Kasprzyk A, Davis S, Moor B De, Brazma A, et al. BioMart  
607 and Bioconductor: a powerful link between biological databases and microarray  
608 data analysis. *Bioinformatics* [Internet]. 2005 Aug;21(16):3439–40. Available from:  
609 <http://dx.doi.org/10.1093/bioinformatics/bti525>
- 610 25. Vilella AJ, Severin J, Ureta-Vidal A, Heng L, Durbin R, Birney E.  
611 EnsemblCompara GeneTrees: Complete, duplication-aware phylogenetic trees in  
612 vertebrates. *Genome Res* [Internet]. 2009;19(2):327–35. Available from:  
613 <http://www.ncbi.nlm.nih.gov/pubmed/19029536>

614  
615  
616  
617  
618  
619  
620  
621

622 **FIGURES**

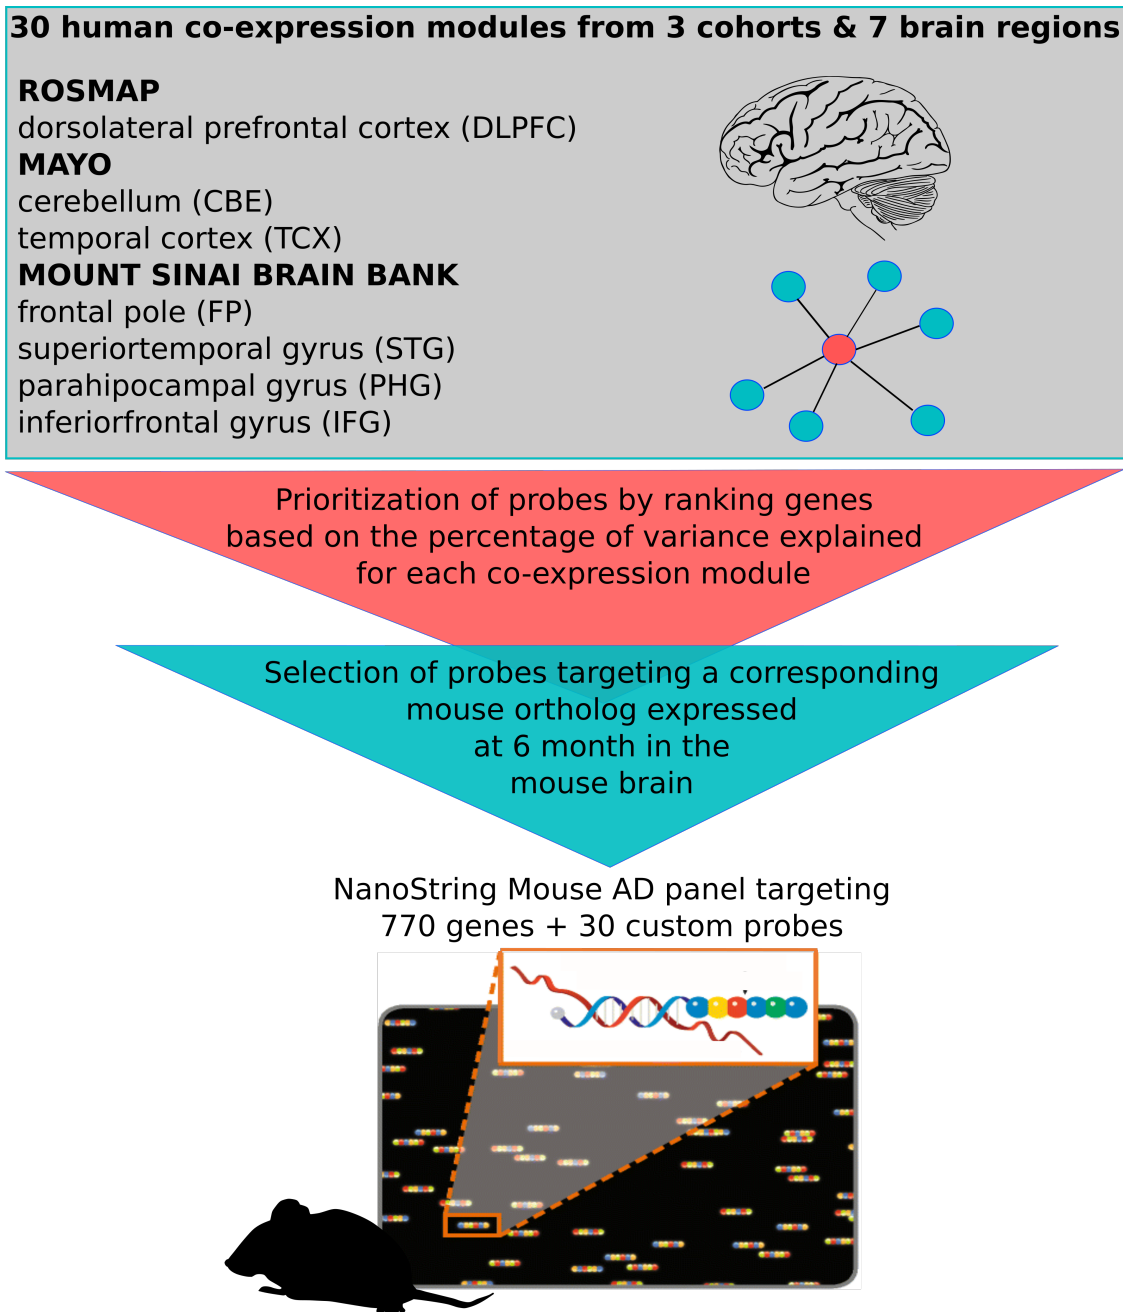

623

624 **Figure 1: Overview of the nCounter Mouse AD panel design**

625 The novel Mouse AD panel measures expression of genes from a set of 30 human co-  
626 expression modules from three human LOAD cohorts, including seven distinct brain  
627 regions. Human genes central to each of the human expression modules were  
628 prioritized for the Mouse AD panel to select conserved signatures of LOAD associated  
629 pathways.

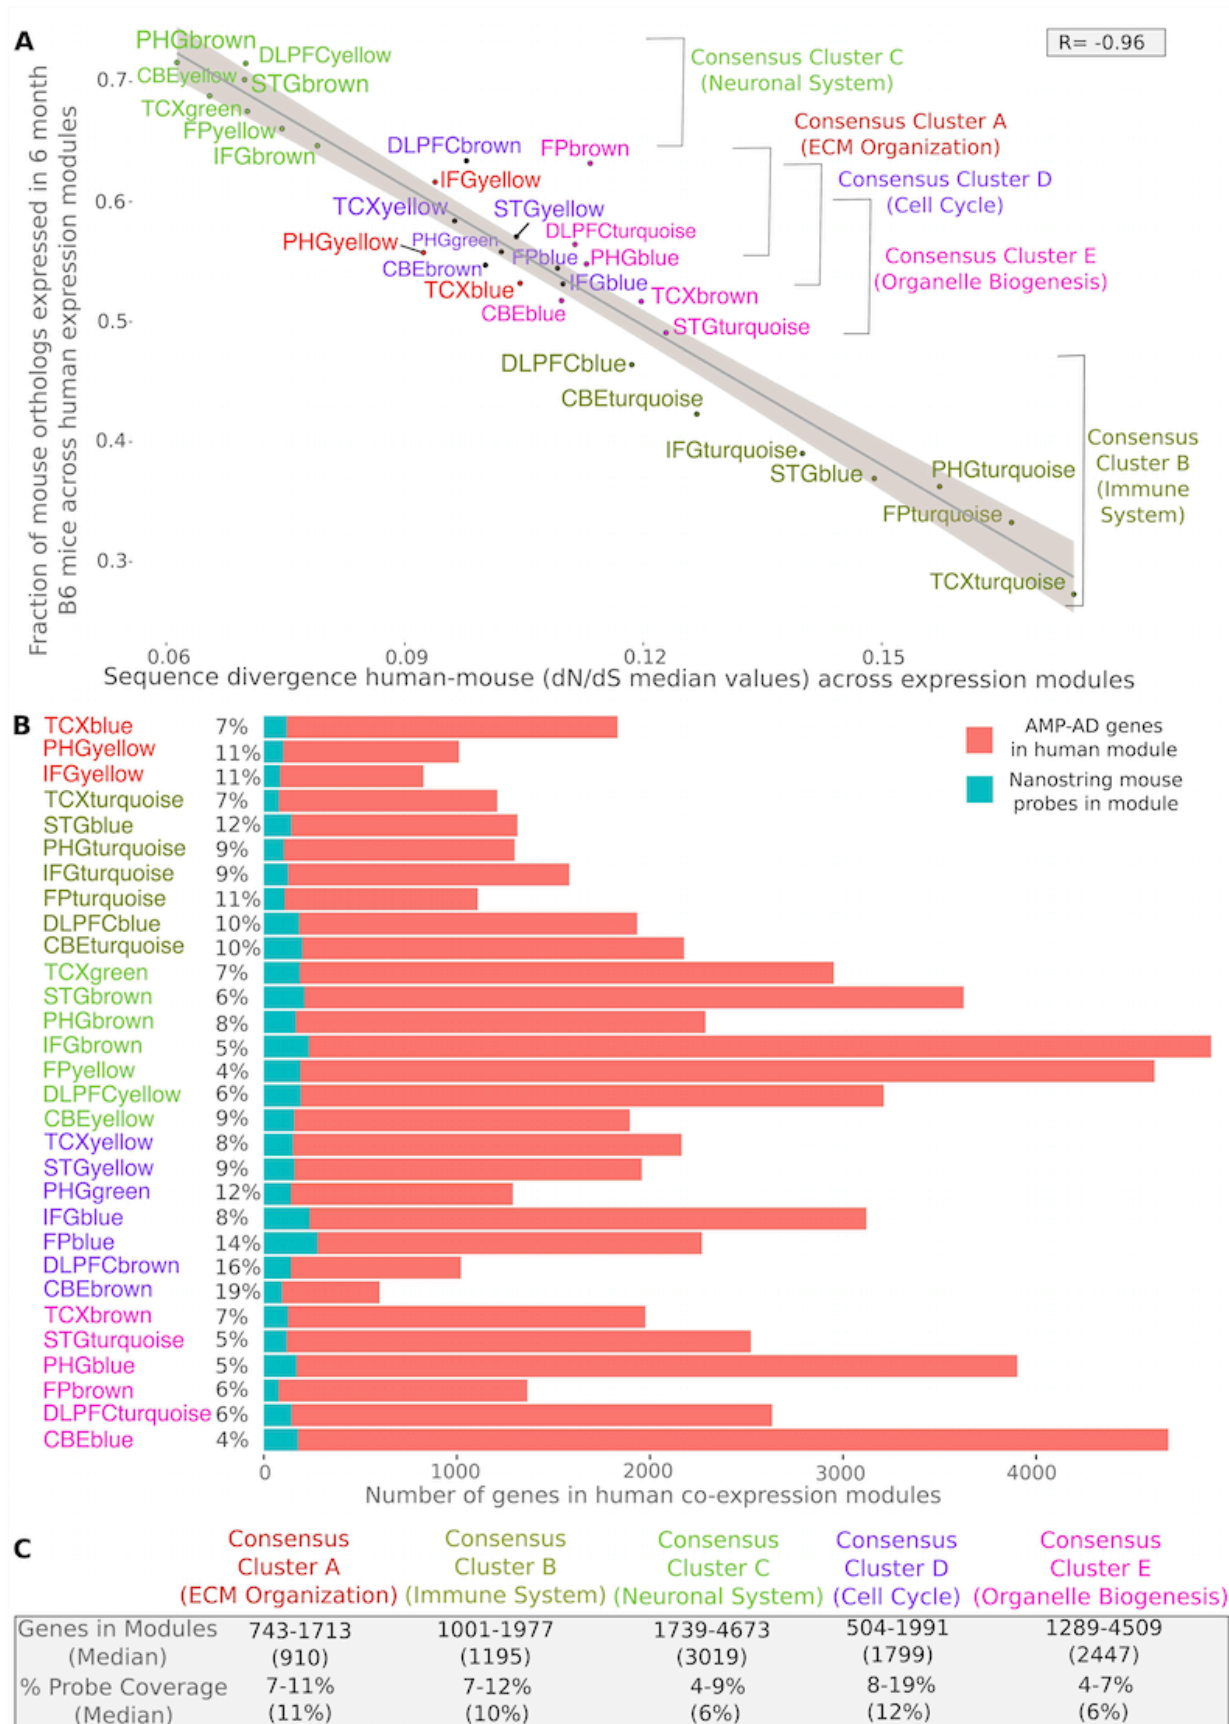

## **Figure 2: Human to mouse comparison and probe coverage summary statistics**

**(A)** Human-mouse sequence divergence (median dN/dS values) is inversely correlated (Pearson's correlation coefficient: -0.96) with the fraction of genes being expressed in B6 mouse brain for each of the human co-expression modules. **(B)** Coverage of the 770 selected mouse NanoString probes for the 30 human co-expression modules associated with five functional consensus clusters. The size and number of human co-expression modules differs for the three post-mortem brain cohorts (ROSMAP, Mayo, Mount Sinai Brain Bank) and across the seven included brain regions. **(C)** This results in a varying degree of probe coverage for each module with a number of disease associated consensus clusters (A-E), reflecting disease related pathways and processes.

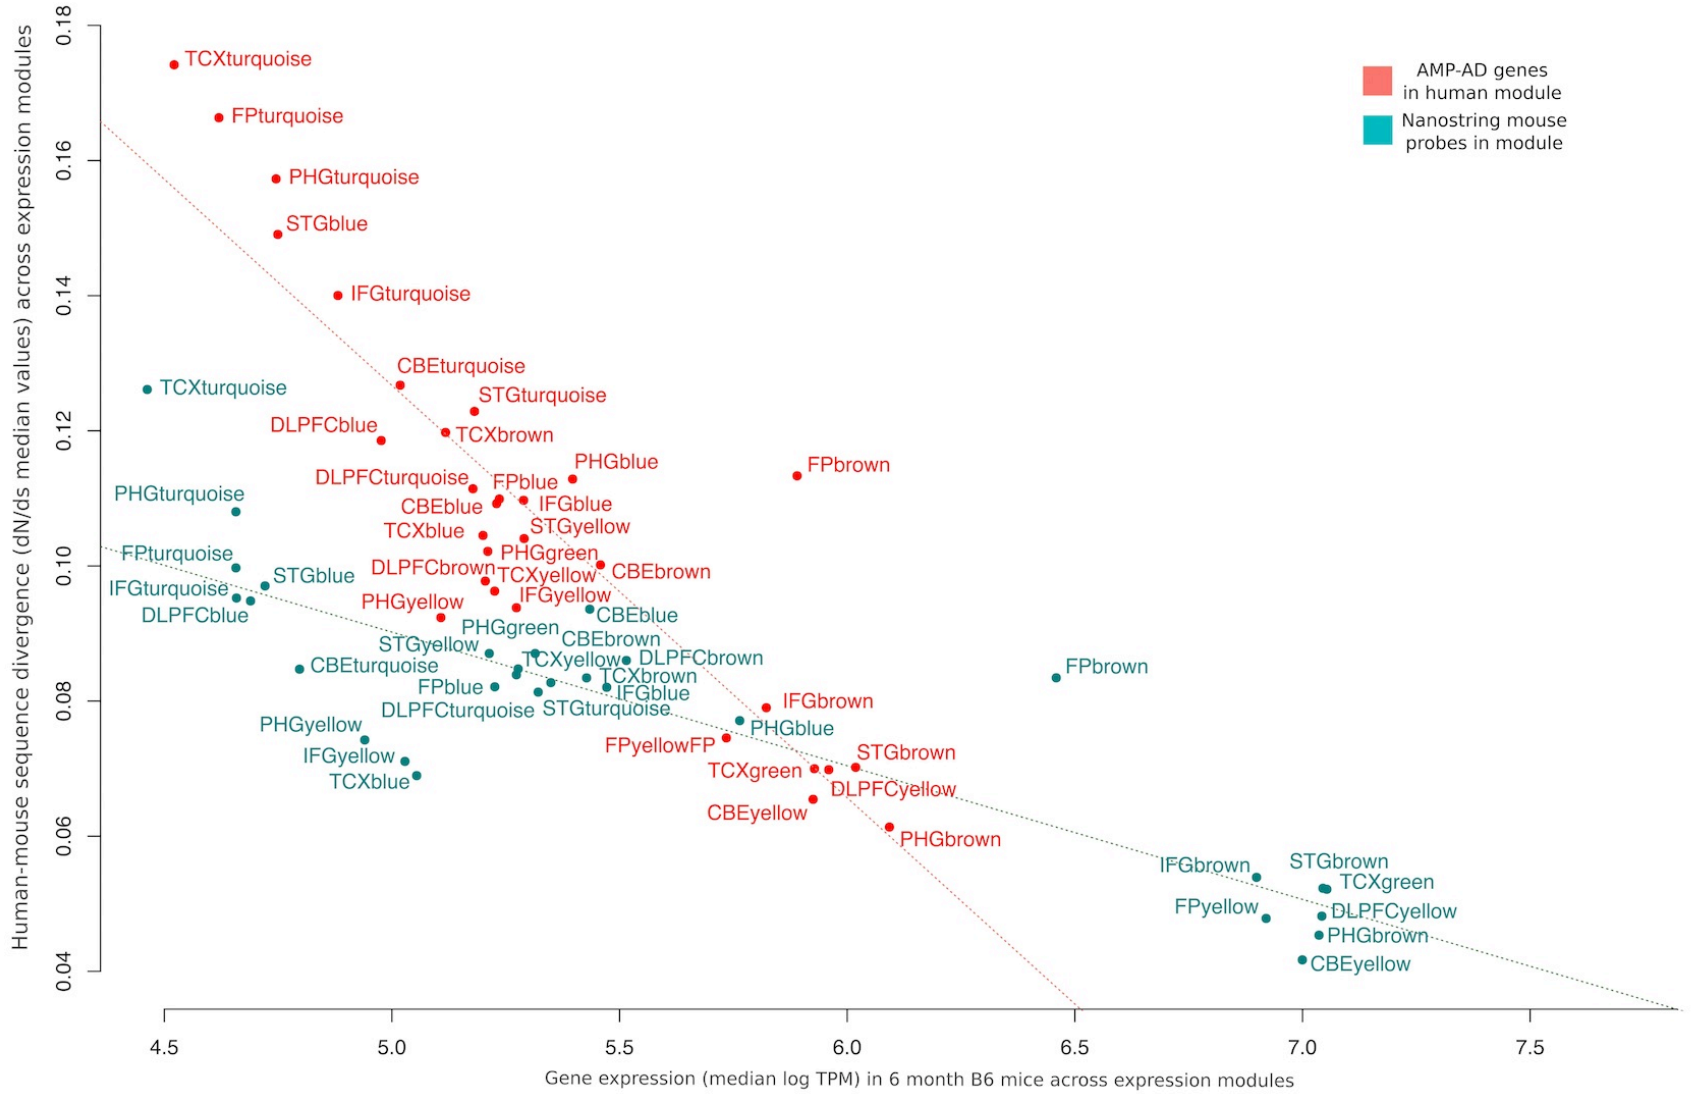

**Figure 3: NanoString Mouse AD probe genes are more conserved and have greater expression in the mouse brain**

Comparison between gene-level sequence divergence and transcript abundances in six month old B6 mouse brains for all genes (red) and the subset of 770 genes covered by NanoString probes (green).

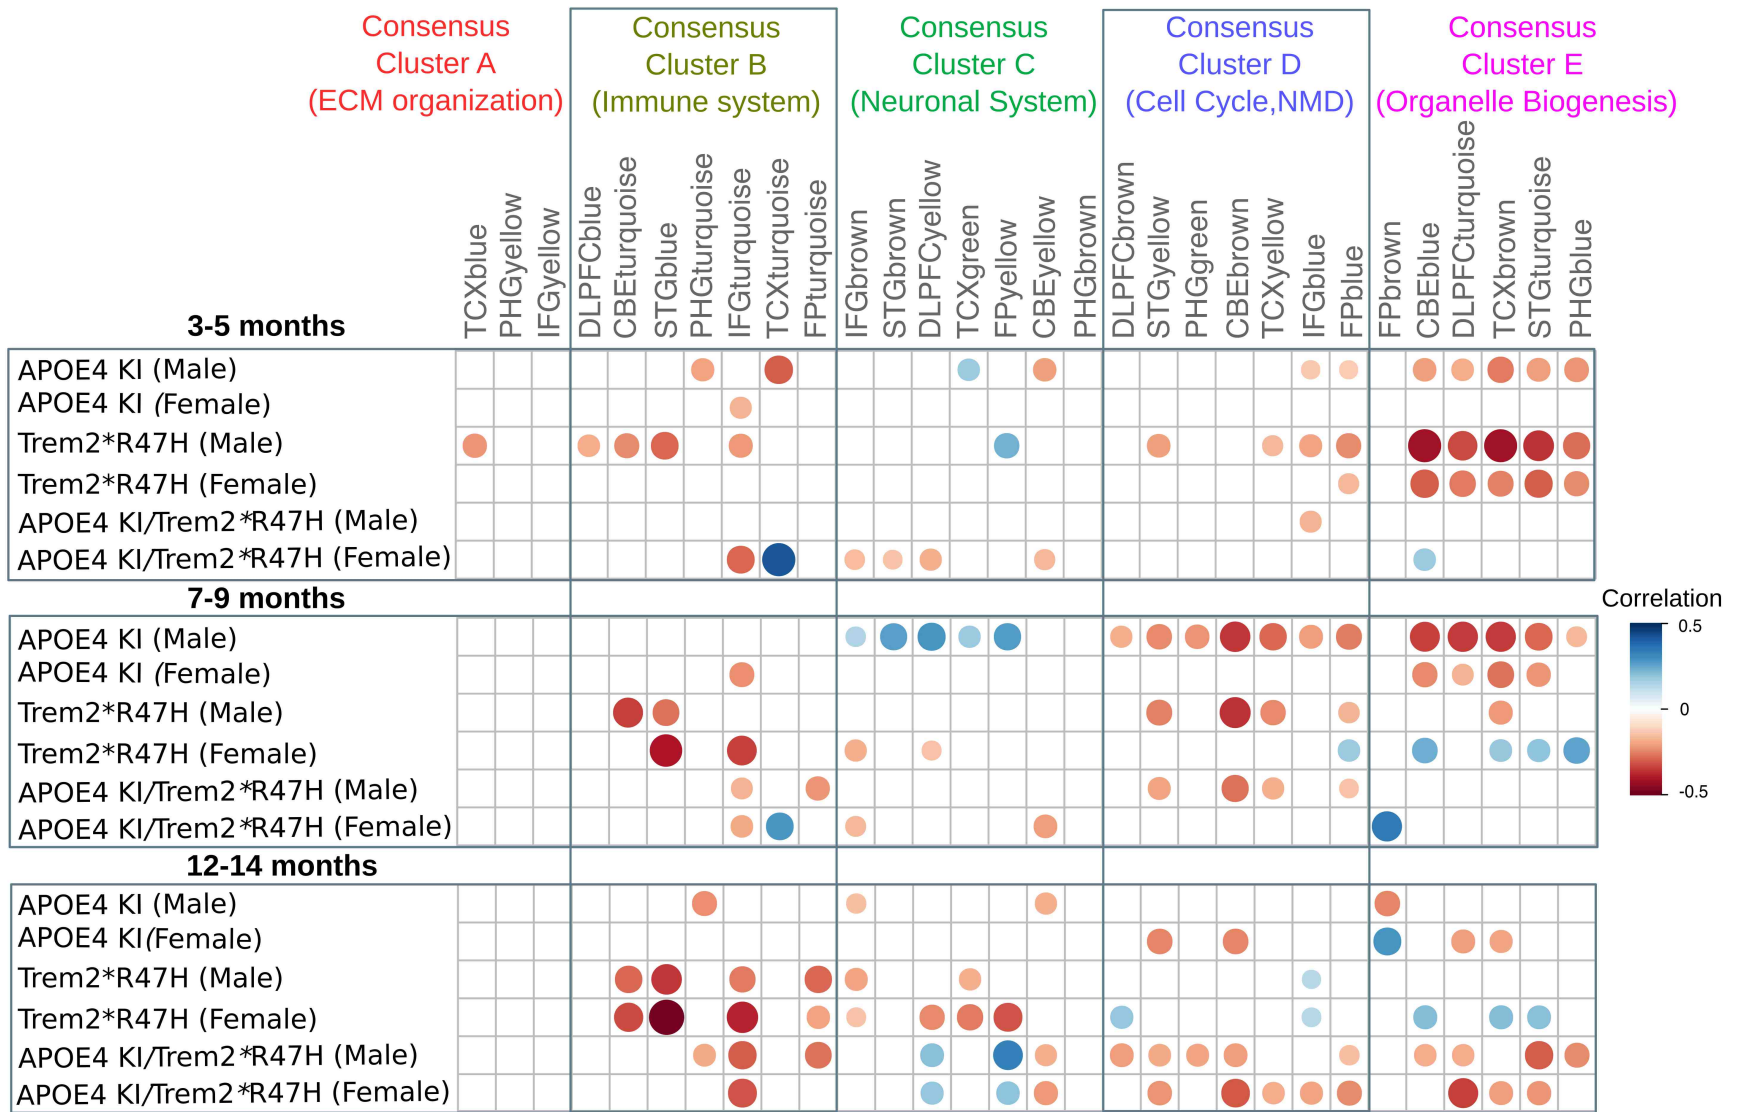

**Figure 4: Correlations between mouse model effects and LOAD effects for the NanoString Mouse AD panel genes across 30 human co-expression modules**

Circles correspond to significant ( $p$ -value  $< 0.05$ ) positive (blue) and negative (red) Pearson's correlation coefficients for gene expression changes in mice (log fold change of strain minus age-matched B6 mice) and human disease (log fold change for cases minus controls). Human co-expression modules are ordered into Consensus Clusters A-E (12) describing major sources of AD-related alterations in transcriptional states across independent studies and brain regions. Consensus clusters are annotated based on the most significantly enriched and non-redundant Reactome pathway terms (Supplemental Tables S1, S2).



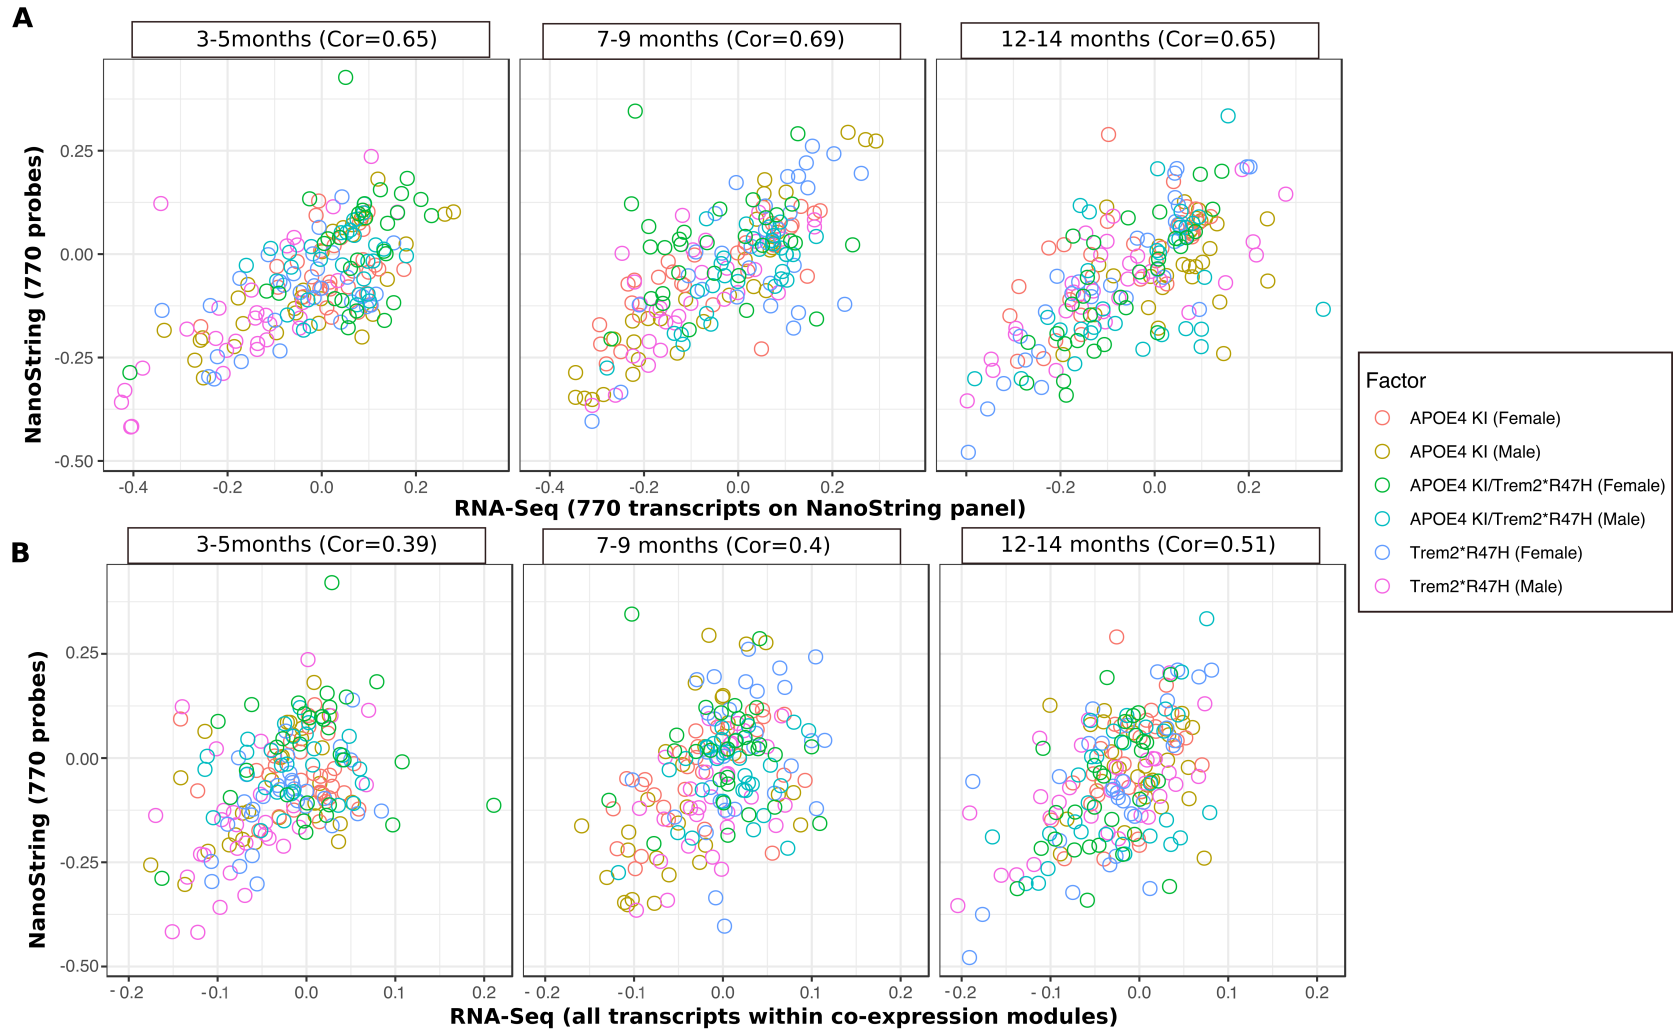

**Figure 5: Platform comparison between the nCounter Mouse AD panel and RNA-Seq correlation with AMP-AD modules across 137 samples**

The plots display the correlation between human AMP-AD co-expression modules and gene expression profiles derived from the NanoString panel and RNA-Seq data for the same 137 mouse samples. A detailed comparison is provided for three different age stages and three mouse models carrying LOAD associated risk variants. **(A)** A strong positive correlation was observed across all ages and samples combined when comparing expression of the 770 transcripts on the NanoString panel. **(B)** The correlation between NanoString and RNA-Seq expression analysis decreased overall when comparing all module transcripts measured by RNA-Seq to the subset of 770 probes on the NanoString panel. However, an age specific effect was observed for the mouse transcripts in which correlation with human co-expression modules increased with age.
